# Supplementary material for: The identity of the South African toad Sclerophrys capensis Tschudi, 1838 (Amphibia, Anura)
Source: PeerJ. 2016 Jan 11;4:e1553. doi: 10.7717/peerj.1553 (PMC4715445; doi:10.7717/peerj.1553)
Supplement: Supplemental Information 1 [file peerj-04-1553-s001.xls]

## Sheet: Feuil1
COLL_NO	Species	STATUS	SPECIES_CODE	Sex	Age	Place	SVL	HW	HL	MN	MFE	MBE	IFE	IBE	FLL	HAL	TFL	TL	FOL	FTL	IN	EN	EL	TYD	TYE	IUE	UEW	PL	PW	IPD	IMT	ITL	OMTL	WTF	WFF	WI	WII	MTTF	MTFF	TFTF	FFTF
BMNH 1858.11.25.160	angusticeps		1	2	1	Cape of Good Hope	46.1	14.5	13.5	12.4	9.5	5.7	6.4	10.8	9.5	10.5	5.81	13.4	16.4	9.9	2.81	2.94	6.06	2.19	1.25	4.06	4	9.45	7.27	7.42	2.38	3.75						6.84	8	8.87	8.87
BMNH 1858.11.25.161	angusticeps		1	1	1	Cape of Good Hope	46.7	16.4	14.3									15.1						2.81	1.5			9.6	4.36	8
BMNH 1858.11.25.162	angusticeps		1	2	1	Cape of Good Hope	47.3	15	14.3									14.1						1.88	1.56			8.87	3.64	8.15
BMNH 1858.11.25.163	angusticeps		1	2	2	Cape of Good Hope	37.7	13	11.6									10.4						1.38	1.13			6.31	2.88	7.38
MNHN 0.384	angusticeps		1	2	1	Longkloof	61	20.2	16.8	15.6	12.9	8.1	9.6	15	13.3	13.5	6.3	18.8	21.4	11.2	3.31	3.56	6.81	2.46	2.4	4.54	4.47	11.97	6.05	10.13	2.92	4.08	1.62	2.07	1.94	1.43	0.91	8.16	9.47	10	10.79
MNHN 0.4941	angusticeps		1	1	1	Le Cap	36.4	13.5	11.7	10.6	8.3	4.7	6.2	10.5	9.3	8.8	4.67	12.2	15.2	8.82	2.27	2.46	5.06	2.27	1.23	2.79	3.37	5.7	3.05	6.03	1.69	2.72	0.78	1.1	1.43	0.52	0.84	3.25	3.56	3.69	3.56
MNHN 0.4947	angusticeps		1	2	1	Le Cap	59.7	20.5	16.2	15.1	12.8	7.1	7.2	14.5	13	12.7	6.1	15.7	20.7	10.7	3.05	2.59	7.26	3.05	1.94	4.21	5.31	12.11	5.39	9.47	2.59	3.18	1.23	1.56	1.3	0.65	0.45	8.68	9.87	10.66	10.79
MNHN 0.4948	angusticeps		1	2	1	Le Cap	54.2	18.3	15.7	14.5	11.3	7	8.1	13.3	13	11.1	5.1	15.1	19.5	11	2.59	3.31	6.61	2.2	1.94	2.92	4.34	8.95	4.34	8.82	2.72	4.15	1.69	1.43	1.49	0.84	0.65	8.16	7.89	10.53	10.92
MNHN 1979.7806	angusticeps		1	1	1	Table Mountain	56.9	18.9	16	14.4	11.4	6.6	8.4	13.4	13	12.1	5.9	16.9	22.4	11.6	2.92	3.05	6.22	2.27	1.62	3.69	4.54	9.87	3.95	8.55	2.92	4.41	1.1	1.81	2.92	1.49	1.94	8.95	10.92	11.05	10.16
MNHN 1979.7807	angusticeps		1	2	1	Region of Cape	52.5	19	19.1	18	18.4	9.5	8.6	14.4	10.5	12.4	8.4	15.6	18.6	10.6	2.66	3.37	6.48	2.66	1.69	4.34	4.73	10	5	9.21	2.59	3.5	1.81	2.14	2.14	1.81	1.36	8.29	8.95	9.08	9.08
MNHN 1979.7808	angusticeps		1	2	1	Region of Cape	46.4	17.1	18.3	17	14.7	9.8	6.9	12.3	10.6	11	7	15	17.6	9.6	2.79	3.18	6.16	2.59	1.43	3.56	3.69	8.68	5	8.55	2.33	3.31	1.81	2.07	1.94	1.75	1.43	8.29	9.08	8.16	8.29
MNHN 1979.7809	angusticeps		1	2	1	Region of Cape	51.1	19	14.8	8.4	11.3	6.8	8	13.3	10.1	11.3	5.3	14.7	18;4	9.2	2.98	3.37	6.03	2.27	1.62	3.05	4.41	10.79	4.74	10.79	2.4	3.5	1.62	1.62	1.56	0.65	0.65	7.63	8.82	8.42	8.68
MNHN 1994.1776	angusticeps		1	2	1	Le Cap	55.6	17.8	15.1	14.4	10.6	6.1	7.5	13.9	12.4	11.3	5.9	15.6	18.9	10.4	2.98	3.76	6.48	2.2	1.88	3.76	4.8	9.87	4.74	8.55	2.79	3.44	1.94	1.81	1.94	1.94	1.36	8.03	8.42	9.21	9.61
MNHN 1994.1777	angusticeps		1	2	1	Le Cap	55.9	19	16.7	15.5	12.4	7.9	7.7	14.2	12.6	11.6	5.9	16.9	20	10.8	3.18	3.18	7.26	2.85	1.69	3.44	4.28	11.45	4.74	8.55	2.85	3.89	1.49	1.75	2.46	1.56	2.07	9.08	10.39	10.26	9.47
MNHN 1994.1778	angusticeps		1	2	1	Longkloof	58	18.8	15.6	13.8	11.3	7	9.1	14.7	11	11.3	6.1	16	18.8	9.7	3.05	3.56	6.03	2.92	1.94	3.24	4.86	9.21	6.71	7.89	3.18	3.56	1.62	1.69	1.88	1.17	1.36	7.63	8.42	8.95	8.95
MNHN 1994.1779	angusticeps		1	1	1	Le Cap	37.7	13.1	11.4	10.5	8.4	4.7	5.5	10.3	9	8.6	4.47	12.1	14	9.47	2.01	2.33	4.73	1.69	1.17	2.79	3.05	7.32	2.92	6.74	1.62	3.05	1.04	1.1	0.97	0.71	0.26	3.44	3.44	4.02	4.21
NMW 26728-1	angusticeps		1	2	1	Strand-fontein	45.9	16.3	14.3	13.2	11.8	6.3	8.5	12.7	10.9	11.3	5.2	15	18.2	9.9	2.68	3.01	5.69	2.44	1.06	3.66	3.82	7.94	3.97	6.83	2.44	3.33	0.89	1.38	1.63	0.98	0.81	7.1	8	9.3	9
NMW 26728-2	angusticeps		1	2	1	Fisantekraal	45.6	17.4	14.4	13.1	11	7.3	8.3	13.1	11.8	11.8	5.7	15	18.9	9.8	3.01	3.17	5.53	2.6	1.63	3.9	4.07	8.41	3.81	8.1	2.6	3.58	1.38	1.63	1.71	1.22	1.46	7.8	8.7	8	8.2
NMW 26728-3	angusticeps		1	2	2	Fisantekraal	31.2	11	9.9	9.1	7.2	4.2	6.2	9.2	6.8	7.6	3.9	9.9	10.5	6.5	2.03	2.28	4.15	1.46	0.89	2.85	2.76	5.4	2.38	5.4	1.63	1.95	0.81	1.22	1.14	1.14	0.73	4.8	4.9	5.4	5.9
NMW 26728-4	angusticeps		1	1	1	Fisantekraal	42.7	14.5	13.2	12	6.5	6.2	7	16.4	10.4	10.1	5.2	14.1	16.8	9.3	2.6	2.85	5.04	2.44	1.3	3.09	3.58	6.98	3.33	6.35	2.2	3.09	1.22	2.03	1.79	1.22	0.98	7.6	8	7.8	8.1
NMW 26728-5	angusticeps		1	2	1	S-Afrika	45	16.1	14.9	13.3	11.4	6.3	6.6	12.3	10.3	11	5.4	14.9	17.7	8.9	2.85	2.85	5.53	2.03	1.14	3.58	3.82	7.14	3.95	6.67	2.28	3.5	1.46	1.38	1.46	1.06	0.81	7.4	8.4	7.9	8.3
NMW 5195-10	angusticeps		1	2	1	Cap	49.5	17.4	14.7	13.3	11.3	7.7	8	12.9	9.6	10.5	4.9	14	18	9.5	2.68	3.17	6.1	2.03	1.71	4.23	4.07	10.16	4.6	8.57	2.36	3.25	0.89	2.03	2.11	1.3	1.3	7	8.3	8.4	7.8
NMW 5195-3	angusticeps		1		2	Cap	37.5	12.1	11.6	11.1	8.6	4.9	5.6	8.7	7.9	8.5	4.6	12.1	16.1	7.9	1.95	2.28	4.47	1.46	1.06	3.25	3.5	7.3	2.06	5.56	2.2	2.93	1.14	1.38	1.38	1.06	0.98	6.2	7.1	7.1	7
NMW 5195-4	angusticeps		1	1	2	Cap	34.9	12	11.3	10.4	8.3	4.8	6.6	10.1	7.7	8.4	4.2	12.2	13.9	7.8	2.28	2.44	4.47	1.46	1.22	2.68	3.58	5.24	2.38	6.19	1.46	2.36	0.73	1.06	1.06	0.57	0.73	5.2	5.9	6.8	6.7
NMW 5195-5	angusticeps		1	1	2	Cap	36.4	13.6	12	11	9.2	5.1	5.7	10.1	7.9	8.5	4.5	12.2	15	8.3	1.79	2.36	4.31	1.46	1.06	2.76	3.17	6.03	3.02	6.35	1.95	2.6	0.65	1.22	1.06	0.73	0.81	6.1	6.2	6.5	6.1
NMW 5195-6	angusticeps		1	2	1	Cap	47	14.6	13.3	11.8	10	5.9	6.8	11.2	9.3	9	4.7	12.8	14.9	7.4	2.44	2.52	5.28	2.11	1.46	3.09	3.9	7.94	2.86	6.83	1.87	3.01	0.89	1.22	1.63	0.73	1.22	5.2	6.6	7.2	6.8
NMW 5195-7	angusticeps		1	2	1	Cap	51.2	17.2	15.9	14.6	11.9	7.6	7.9	13	10.9	10.8	5.5	15.2	17.9	10.3	2.85	2.85	6.18	2.68	1.22	3.58	3.9	9.52	4.13	8.1	2.44	3.98	1.22	1.38	1.71	1.22	0.81	7.4	8.6	8.8	8.5
NMW 5195-8	angusticeps		1	2	1	Cap	52	18.7	15.3	13.4	11.5	7.4	11.5	13.8	7.3	10.6	5.2	14.6	17.5	9.1	2.76	3.25	6.59	2.28	1.22	3.5	4.31	9.52	4.13	8.57	2.68	2.93	0.89	2.11	2.2	1.3	1.71	6.7	7.4	8.2	7.5
NMW 5195-9	angusticeps		1	2	1	Cap	45.9	16.1	15.1	13.2	11.6	6.7	7.2	11.9	10	10.7	5.3	14.3	16.9	9	2.44	2.44	5.93	1.79	1.63	3.09	3.66	7.78	3.33	6.98	2.03	3.33	1.14	1.3	1.95	0.81	1.46	6.8	8.4	8.4	8.3
NMW 5196-1	angusticeps		1	2	1	Cape of Good Hope	51.3	19	16.9	15.4	13.3	7.9	8.3	12.2	10.9	10.5	5.6	15.4	19.9	10	2.76	3.17	6.02	2.36	1.22	3.66	3.98	9.68	4.29	8.89	2.76	3.33	1.38	1.38	1.71	0.89	0.81	8	9.1	9	8.4
NMW 5196-2	angusticeps		1	2	1	Cape of Good Hope	49.5	17	15.5	14.7	11.7	7.5	8	13	10.6	10.2	5.1	14.8	17.6	14.2	2.76	3.09	6.02	2.36	1.22	3.66	3.98	9.68	4.29	8.89	2.11	2.85	1.38	0.98	1.79	0.65	0.65	7.1	8.8	7.8	7.7
ZFMK 33168	angusticeps		1	1	1	Kap Provinz	48.2	15.9	14.7	13.2	11	6.5	5.8	12	10.9	11.1	5.6	15.4	21.2	12	2.59	2.92	5.83	2.66	1.62	2.98	3.89	9.87	3.29	8.95	2.14	3.56	0.97	1.56	1.1	1.36	0.65	8	7.3	8.9	9.4
ZFMK 33169	angusticeps		1	1	1	Kap Provinz	45.2	15.9	13.1	11.8	9.2	4.8	6	12.3	11.1	11.2	5.7	14.8	19.9	12.3	2.59	2.2	5.06	2.27	1.81	3.56	4.02	9.61	4.61	7.24	2.66	3.31	1.1	1.17	1.43	0.78	0.65	7.8	8.5	9.5	9.6
ZFMK 85713	angusticeps		1	2	1	Mountain Zebra Park	67	23.3	18.2	16.4	12.5	7.4	10.6	15.8	14.4	14.2	7.2	20.3	23.2	11.5	4.02	4.02	6.74	3.76	1.49	4.08	5.51	12.89	6.58	9.87	3.31	4.67	3.11	1.1	1.1	1	4	9.1	10.8	11.2	10
ZFMK 85733	angusticeps		1	2	1	Cape Angulhas	55	19.7	16.3	15.2	12.7	7.9	9.1	13.3	13.2	13	7	17.3	20.1	9.7	3.24	3.89	6.09	3.24	1.75	4.41	4.21	12.37	3.68	10.79	3.24	4.41	2.07	1.23	1.69	0.97	0.97	8.4	8.6	8.4	8
ZFMK 85735	angusticeps		1	1	1	Cape Angulhas	44.9	15.2	13.6	12.4	10	6	7.1	12.3	10.1	10.7	5.7	14.5	17.7	10.6	2.46	3.11	4.8	2.79	1.62	3.24	4.21	8.42	4.21	8.42	2.27	3.89	1.62	1.56	1.49	1.17	0.45	7.6	8.6	8.8	9
ZFMK 85737	angusticeps		1	1	1	Mossel Bay	47.8	16.8	13.8	12.6	10.1	6.3	7.5	12.2	10.7	10.6	5.5	14.7	16.4	9.2	2.66	3.24	5.19	2.33	1.43	3.76	4.02	9.21	3.95	8.82	2.46	3.56	1.69	1.43	1.43	1.1	0.71	8	8.3	8.9	9.1
BMNH 1858.11.25.157	gariepensis	Lecotype	2	1	2	Banks of the Orange (Gariep) River	34.5	12.8	10.5	9.4	7.2	3.6	6	10.5	6.9	7.6	4	10.3	11.7	6.63	2.25	2.31	4.38	0.94	0.69	2.69	3.44	6.38	4.5	6.38	1.63	2.65						4.56	5	6.25	6.31
BMNH 1858.11.25.157A	gariepensis	Paralectotype	2	1	2	banks of the Orange (Gariep) River	29.9	10.7	9.8									9.6						1	0.94			6.25	3.81	4.69
NMW 5194-4	gariepensis		2	1		Cap	50.3	17.5	14.9	14	11.5	7.6	7.9	13.1	12.2	11.5	6.1	15.6	19.2	10.1	2.52	3.25	5.69	2.6	1.54	3.58	4.39	7.32	4.07	9.27	2.28	3.66	1.46					6.4	9	10.4	9.5
NMW 5197	gariepensis		2	2		Capland	78.4	28.6	24.1	21.5	17.9	11.6	12.8	20	19	18	8.5	26	29.2	15.1	4.23	4.63	8.46	4.55	1.95	5.93	6.34	16.83	6.35	12.38	4.76	5.24	1.9					10.6	13	13.8	14
ZFMK 85701	gariepensis		2	2	1	Vioolsdrif	59.2	20.8	18.4	16.5	12.7	7.5	10.4	15.3	11.6	13.6	7.3	22.4	25.2	13.7	3.44	4.34	6.55	4.73	1.3	4.21	4.93	11.18	5.66	10.13	3.24	4.47	2.14	2.59	1.94	1.62	1.23	10.5	11.5	11.1	11.1
ZFMK 85702	gariepensis		2	1	1	Vioolsdrif	58.9	19.8	18.3	16.4	13	7.1	8.4	15.2	13.5	15.1	7.8	23.9	26.6	14.3	3.37	3.37	7.91	4.41	1.1	5.51	4.54	12.76	4.21	9.87	3.31	5.06	1.75	2.58	2.46	2.2	1.94	11	11.9	12.6	11.7
ZFMK 85703	gariepensis		2	1	1	Vioolsdrif	52.3	19.1	16.7	14.9	11	5.8	8.4	13	11.3	12.6	6.2	21	24	13.1	3.05	4.08	6.48	3.89	1.04	4.21	4.67	10.92	4.61	8.42	2.14	3.95	1.75	2.72	2.4	1.94	2.27	10.3	10.5	10.5	10.6
ZFMK 85704	gariepensis		2	1	1	Vioolsdrif	57.1	20.6	17.8	15.7	12.3	7	9.7	15	13.5	15.1	7.9	23.1	27.5	12.9	3.89	3.82	6.61	4.34	1.1	4.28	5.06	13.82	4.61	9.74	3.05	5.31	1.94	2.4	2.66	2.07	1.81	12	12.8	13	13.2
ZFMK 85705	gariepensis		2	1	1	Vioolsdrif	56.8	19.6	17.5	15.4	11.9	6.9	10	15.1	12.2	13.9	8.1	23.5	25	14	3.56	4.08	6.68	4.21	1.3	4.73	4.54	11.18	4.21	9.87	3.37	4.54	1.94	2.92	3.82	2.59	3.05	13.3	11.5	11	11
ZFMK 85706	gariepensis		2	2	1	Vioolsdrif	58.3	21.1	19.6	17.2	12.9	7.7	10	15.8	13.1	14.8	7.6	26.2	27.1	15.1	3.56	3.76	6.74	4.73	1.1	4.93	5.06	13.42	5	10.13	3.05	5.06	2.07	2.92	2.59	2.46	1.88	12.7	13.1	11.6	11.9
ZFMK 85708	gariepensis		2	1	1	Vioolsdrif	60.6	21.5	18.9	17.3	13.6	6.9	9.7	16.4	15.1	14.6	8.1	25.7	28.8	15.3	3.56	4.47	7.13	4.86	1.17	5.06	5.38	14.21	5	10.53	2.92	5.31	2.27	2.98	2.33	2.33	1.94	13.4	14.4	13.4	13
ZFMK 85710	gariepensis		2	2	1	Augrabies	60.1	24	19.4	16.7	13.1	8.3	10.5	15.6	13	15.5	7.3	24.9	27.5	15	3.44	4.08	7	4.99	1.3	4.34	5.12	15.4	6.05	11.18	3.44	4.54	2.27	2.98	2.07	2.4	1.36	12	13	12.3	12.4
ZFMK 85711	gariepensis		2	1	1	Augrabies	56.3	19.9	18.5	16.6	13	6.9	9.6	14.2	13.2	14.1	6.8	24	26.4	13.4	3.24	3.95	6.81	4.34	1.1	4.21	5.51	12.5	4.61	9.74	3.11	4.73	2.72	3.44	2.59	3.24	2.72	12	13.1	10.9	11.3
ZFMK 85712	gariepensis		2	2	1	Augrabies	67.6	25	21.2	19.1	14.9	8.9	12.1	16.8	15.2	16.5	7.9	29	29.5	15.6	4.08	4.47	7.19	4.54	1.75	4.54	5.64	15.79	5.26	10.66	3.76	5.38	2.59	3.76	3.56	2.72	2.79	13.5	14.9	12.8	11.5
NMW 26724	rangeri		3	2	1	Tshipise. N-Transvaal	92.3	36.1	33	29.1	24.9	16.6	16.3	23.3	19.8	20.3	9.9	34.4	37.8	20.5	5.2	6.1	9.7	5.7	2.1	6.2	7.1	23.6	11.1	13	4.2	6	3.1	4.6	5	4.4	3	16.9	13.9	17.1	16.4
NMW 5193	rangeri		3		2	Port Elisabeth	52.6	21.9	17.7	15.2	11.7	7.3	9.6	14.4	11	12.2	6.4	20.1	22.2	11.8	3.25	3.98	6.18	3.74	1.3	4.47	3.82	10	4.76	7.95	2.38	3.65	2.38	2.38	2.06	1.75	1.59	9.7	9.7	9.4	9.7
ZFMK 85672	rangeri		3	2	1	Mossel Bay	92.2	35.9	29	26	26.7	13.9	15.2	24.2	21.6	21.6	10.5	37.6	40.8	20.5	5.39	5.53	10.53	6.05	2.89	6.58	7.76	20.7	9.8	14.3	4.34	6.84	3.68	5.53	5	3.95	3.95	18.7	20.2	16.9	16.8
ZFMK 85673	rangeri		3	2	1	Mossel Bay	88.4	32.2	28.8	26.2	20.8	13.3	12.2	22.2	21.2	20.1	9.4	34.8	37.8	19.8	4.74	5.92	10	5.92	2.76	7.11	6.58	20.7	9.9	11.6	4.08	6.58	2.24	3.68	3.03	2.89	2.37	17.5	18.1	16.7	16
ZFMK 85674	rangeri		3	2	1	Mossel Bay	85.7	33.5	27.7	25	20.1	12.4	13.5	22.6	19.6	21.5	11.1	35	38.7	20.7	5.26	5.26	10	5.92	1.97	7.24	7.24	20.5	10.2	13.4	4.21	7.37	3.42	5.13	4.47	4.47	3.68	17.5	19.6	16.7	16.8
ZFMK 85675	rangeri		3	2	1	Mossel Bay	82.1	31.4	35.8	22.5	18.9	10.9	12.4	21.5	19.2	18.1	9.1	33.7	34.6	18	5	5	9.61	6.32	1.97	6.84	6.58	22.6	9.4	18.7	5.26	5.79	2.24	2.63	3.55	2.89	2.5	13.8	15.7	15.6	15.3
ZFMK 85676	rangeri		3	2	1	Mossel Bay	80.3	31.1	27.1	24.3	20.7	13.3	12	20.1	18.6	19.1	9.5	33.1	36.1	18.7	4.74	5	10.13	6.32	2.37	5.26	6.97	21.5	8.6	11.4	4.34	5.79	2.89	4.34	4.47	3.16	3.42	26.4	27.6	15.4	16.2
ZFMK 85677	rangeri		3	1	1	Mossel Bay	63.7	24.6	22.1	19.6	15.6	9.8	11.1	17.4	14.8	15.9	7.8	27.1	28.8	15.8	3.95	4.34	8.82	3.95	2.37	5	5.39	14.6	6.9	11.1	3.68	3.68	2.63	3.29	2.37	2.89	1.45	13	13.4	12.5	14.3
ZFMK 85678	rangeri		3	2	1	Mossel Bay	81.3	30.9	24.9	22	19.9	11.5	13.5	21.5	18.9	18.7	10.3	33.5	37.4	19.5	4.87	5	9.21	5.26	2.37	6.32	6.32	19.1	8.3	12.6	4.74	6.32	2.63	5.26	4.47	4.21	3.42	17.3	18.2	15.5	19.1
ZFMK 85679	rangeri		3	2	1	Mossel Bay	81.4	32	35.9	23.6	18.8	11.6	13	21.2	17.7	20.1	10.5	33.4	36.4	18.8	5	5.26	9.74	6.18	2.24	6.32	6.58	19	7.9	14	4.74	6.71	3.16	5	4.08	4.21	3.03	17	17.4	14.8	15.3
ZFMK 85680	rangeri		3	2	1	Mossel Bay	93.2	37.8	32.6	29	24	15.9	15.8	24.9	22.1	21.7	11.1	38.9	41.4	21.1	5.4	5.5	10.5	6.1	2.9	6.6	7.8	24	11.9	15.1	5.66	7.24	3.68	5.92	3.68	3.68	1.97	18	19.3	18.3	17.6
ZFMK 85681	rangeri		3	1	1	Cape Angulhas	72.3	27.4	24.2	21.3	27.6	10.2	10.1	19	18.4	19.2	9.2	31.6	36.8	18.5	4.34	4.08	10.13	5.26	2.11	4.74	5.39	17.6	8	10	5	5.39	2.89	5.13	4.47	4.08	3.29	17.4	18.8	14.2	14
ZFMK 85682	rangeri		3	1	2	Johannesburg	51.3	20.8	18.8	17	13.7	8	9.1	14.7	12.1	13.1	6.5	22.7	24	13.1	3.29	3.68	7.24	4.61	1.58	4.87	4.61	11.05	4.87	10.53	3.03	3.95	2.24	2.76	2.76	2.24	2.24	9.9	11.1	9.9	10.1
MNHN 0.384	capensis			1	2	Cap	41.2	17	13.2	12.1	9.6	4.8	7.1	11.4	10.1	10.3	5.38	17.2	18.4	10.7	2.72	2.79	6.48	2.92	1.17	4.21	4.54	10.39	4.08	8.55	2.07	3.56		3.68	3.68	2.37	1.58	8.68	9.08	9.61	10.53

## Sheet: Feuil2
COLL_NO	Species	Sex	Age	Place
BMNH 1858.11.25.160	angusticeps	female	adult	Cape of Good Hope
MNHN 0.384	angusticeps	female	adult	Longkloof
MNHN 0.4941	angusticeps	male	adult	Le Cap
MNHN 0.4947	angusticeps	female	adult	Le Cap
MNHN 0.4948	angusticeps	female	adult	Le Cap
MNHN 1979.7806	angusticeps	male	adult	Table Mountain
MNHN 1979.7807	angusticeps	female	adult	Region of Cape
MNHN 1979.7808	angusticeps	female	adult	Region of Cape
MNHN 1979.7809	angusticeps	female	adult	Region of Cape
MNHN 1994.1776	angusticeps	female	adult	Le Cap
MNHN 1994.1777	angusticeps	female	adult	Le Cap
MNHN 1994.1778	angusticeps	female	adult	Longkloof
MNHN 1994.1779	angusticeps	male	adult	Le Cap
NMW 26728-1	angusticeps	female	adult	Strand-fontein
NMW 26728-2	angusticeps	female	adult	Fisantekraal
NMW 26728-3	angusticeps	female	young	Fisantekraal
NMW 26728-4	angusticeps	male	adult	Fisantekraal
NMW 26728-5	angusticeps	female	adult	S-Afrika
NMW 5195-10	angusticeps	female	adult	Cap
NMW 5195-3	angusticeps		young	Cap
NMW 5195-4	angusticeps	male	young	Cap
NMW 5195-5	angusticeps	male	young	Cap
NMW 5195-6	angusticeps	female	adult	Cap
NMW 5195-7	angusticeps	female	adult	Cap
NMW 5195-8	angusticeps	female	adult	Cap
NMW 5195-9	angusticeps	female	adult	Cap
NMW 5196-1	angusticeps	female	adult	Cape of Good Hope
NMW 5196-2	angusticeps	female	adult	Cape of Good Hope
ZFMK 33168	angusticeps	male	adult	Kap Provinz
ZFMK 33169	angusticeps	male	adult	Kap Provinz
ZFMK 85733	angusticeps	female	adult	Cape Angulhas
ZFMK 85735	angusticeps	male	adult	Cape Angulhas
ZFMK 85737	angusticeps	male	adult	Mossel Bay
BMNH 1858.11.25.157	gariepensis	male	young	Banks of the Orange (Gariep) River
NMW 5194-4	gariepensis	male		Cap
NMW 5197	gariepensis	female		Capland
ZFMK 85701	gariepensis	female	adult	Vioolsdrif
ZFMK 85702	gariepensis	male	adult	Vioolsdrif
ZFMK 85703	gariepensis	male	adult	Vioolsdrif
ZFMK 85704	gariepensis	male	adult	Vioolsdrif
ZFMK 85705	gariepensis	male	adult	Vioolsdrif
ZFMK 85706	gariepensis	female	adult	Vioolsdrif
ZFMK 85708	gariepensis	male	adult	Vioolsdrif
ZFMK 85710	gariepensis	female	adult	Augrabies
ZFMK 85711	gariepensis	male	adult	Augrabies
ZFMK 85712	gariepensis	female	adult	Augrabies
NMW 26724	rangeri	female	adult	Tshipise. N-Transvaal
NMW 5193	rangeri		young	Port Elisabeth
ZFMK 85672	rangeri	female	adult	Mossel Bay
ZFMK 85673	rangeri	female	adult	Mossel Bay
ZFMK 85674	rangeri	female	adult	Mossel Bay
ZFMK 85675	rangeri	female	adult	Mossel Bay
ZFMK 85676	rangeri	female	adult	Mossel Bay
ZFMK 85677	rangeri	male	adult	Mossel Bay
ZFMK 85678	rangeri	female	adult	Mossel Bay
ZFMK 85679	rangeri	female	adult	Mossel Bay
ZFMK 85680	rangeri	female	adult	Mossel Bay
ZFMK 85681	rangeri	male	adult	Cape Angulhas
ZFMK 85682	rangeri	male	young	Johannesburg
MNHN 0.384	capensis	male	young	Cap
